# Supplementary material
Source: publisher site journal article supplement (https://www.dovepress.com/article/222910)
Supplement: Supplementary file 1 [file get_supplementary_file.php]

#### Table S1. ORR and response.

| **Response** | **No. of Patients (%)** | | | ***P*** |
| --- | --- | --- | --- | --- |
| **Total** | **B+PP (n=26)** | **PP (n=45)** |
| CR | 0 (0) | 0 (0) | 0 (0) |  |
| PR | 34 (47.9) | 14 (53.8) | 20 (44.4) |  |
| SD | 24 (33.8) | 9 (34.6) | 15 (33.3) |  |
| PD | 13 (18.3) | 3 (11.5) | 10 (22.2) |  |
| ORR | 34 (47.9) | 14 (53.8) | 20 (44.4) | 0.445 |
| DCR | 58 (81.7) | 23 (88.5) | 35 (77.8) | 0.422 |

Abbreviations: B+PP, bevacizumab plus pemetrexed-platinum; PP, pemetrexed-platinum; CR, complete response; PR, partial response; SD, stable disease; PD, progressive disease; ORR, objective response rate; DCR, disease control rate.

#### Table S2. Intracranial ORR and response.

| **Intracranial Response** | **No. of Patients (%)** | | | ***P*** |
| --- | --- | --- | --- | --- |
| **Total** | **B+PP (n=26)** | **PP (n=45)** |
| CR | 3 (4.2) | 3 (11.5) | 0 (0) |  |
| PR | 33 (46.5) | 11 (42.3) | 22 (48.9) |  |
| SD | 29 (40.8) | 11 (42.3) | 18 (40.0) |  |
| PD | 6 (8.5) | 1 (3.8) | 5 (11.1) |  |
| ORR | 36 (50.7) | 14 (53.8) | 22 (48.9) | 0.565 |
| DCR | 65 (91.5) | 25 (96.2) | 40 (88.9) | 0.537 |

Abbreviations: B+PP, bevacizumab plus pemetrexed-platinum; PP, pemetrexed-platinum; CR, complete response; PR, partial response; SD, stable disease; PD, progressive disease; ORR, objective response rate; DCR, disease control rate.
